# Supplementary material for: On the role of local charge carrier mobility in the charge separation mechanism of organic photovoltaics
Source: Royal Society of Chemistry journal article supplement (doi:10.1039/c5cp01604e), 2015-01-01
Supplement: c5cp01604e1.pdf [file c5cp01604e1.pdf]

## Electronic Supplementary Information (ESI)

### On the Role of Local Charge Carrier Mobility in the Charge Separation Mechanism of Organic Photovoltaics

*Saya Yoshikawa,<sup>a</sup> Akinori Saeki,\*<sup>a,b</sup> Masahiko Saito,<sup>c</sup> Itaru Osaka,<sup>b,c</sup> and Shu Seki\*<sup>a</sup>*

<sup>a</sup>Department of Applied Chemistry, Graduate School of Engineering, Osaka University, 2-1 Yamadaoka, Suita, Osaka 565-0871, Japan.

<sup>b</sup>Japan Science and Technology Agency (JST)-PRESTO, 4-1-8 Honcho Kawaguchi, Saitama 332-0012, Japan.

<sup>c</sup>Emergent Molecular Function Research Group, RIKEN Center for Emergent Matter Science (CEMS), Wako, Saitama 351-0198, Japan.

This supporting information presents the following contents.

**Supporting Tables S1-S4, Figures S1-S11**

## Supporting Table

**Table S1. OPV device parameters and  $\Sigma\mu$  measured by TRMC**

| Polymer <sup>a</sup>        | PCE (%) | V <sub>oc</sub> (V) | J <sub>sc</sub> (mAcm <sup>-2</sup> ) | FF (%) | PCE/V <sub>oc</sub> (% V <sup>-1</sup> ) | Solvent <sup>b</sup> | $\Sigma\mu$ blend (cm <sup>2</sup> V <sup>-1</sup> s <sup>-1</sup> ) | $\Sigma\mu$ polymer (cm <sup>2</sup> V <sup>-1</sup> s <sup>-1</sup> ) | Ref <sup>c</sup> |
|-----------------------------|---------|---------------------|---------------------------------------|--------|------------------------------------------|----------------------|----------------------------------------------------------------------|------------------------------------------------------------------------|------------------|
| PCPDTBT (1:3)               | 3.35    | 0.66                | 11.74                                 | 43     | 5.08                                     | DCB                  | 0.050                                                                | 0.19                                                                   | [S1]             |
| PCPDTBT (1:3)               | 5.12    | 0.61                | 15.73                                 | 53     | 8.39                                     | CB / DIO             | 0.099                                                                |                                                                        | [S1]             |
| PCDTBT (1:4)                | 6.10    | 0.88                | 10.60                                 | 66     | 6.93                                     | DCB                  | 0.060                                                                | 0.22                                                                   | [S2]             |
| PBDTTT-CF (1:1.5)           | 6.22    | 0.75                | 13.56                                 | 59     | 8.29                                     | DCB                  | 0.13                                                                 | 0.031                                                                  | [S3]             |
| PBDTTT-CF (1:1.5)           | 7.40    | 0.75                | 13.56                                 | 69     | 9.87                                     | CB / DIO             | 0.089                                                                |                                                                        | [S3]             |
| PSBTBT (1:1.5)              | 5.10    | 0.68                | 12.70                                 | 55     | 7.50                                     | DCB                  | 0.083                                                                |                                                                        | [S4]             |
| P3HT (1:1)                  | 4.37    | 0.61                | 10.6                                  | 67     | 7.16                                     | DCB                  | 0.26                                                                 | 0.30                                                                   | [S5]             |
| PBTTT-C <sub>14</sub> (1:4) | 2.34    | 0.53                | 9.37                                  | 48     | 4.42                                     | DCB                  | 0.16                                                                 | 2.3                                                                    | [S6]             |
| PQT-12 (1:4)                | 1.15    | 0.61                | 4.31                                  | 44     | 1.88                                     | DCB                  | 0.057                                                                | 0.22                                                                   | [S7]             |
| PTzBT-BOHD (1:2)            | 6.65    | 0.89                | 11.35                                 | 65     | 7.47                                     | CB                   | 0.23                                                                 | 0.24                                                                   | [S8]             |
| PTzBT-14HD (1:2)            | 5.42    | 0.82                | 9.93                                  | 66     | 6.61                                     | CB                   | 0.19                                                                 |                                                                        | [S8]             |
| PTzBT-14OD (1:2)            | 5.12    | 0.82                | 9.77                                  | 64     | 6.24                                     | CB                   | 0.14                                                                 |                                                                        | [S8]             |

<sup>a</sup> Polymer (p/n blend ratio with PCBM) <sup>b</sup> The solvent and additive. DCB: *o*-dichlorobenzene, CB: chlorobenzene, DIO: 1,8-diiodooctane. <sup>c</sup> Reference number of the device performance.

**Table S2. Summary of XRD measurements of polymer:PCBM blend.**

| Polymer <sup>a</sup>        | Inter-lamellar peak intensity (counts) | $2\theta$ (°)  | $d$ (nm) <sup>b</sup> | $L_{(100)}$ (nm) <sup>c</sup> |
|-----------------------------|----------------------------------------|----------------|-----------------------|-------------------------------|
| P3HT (1:1)                  | $3.8 \times 10^3$                      | 5.44           | 1.62                  | 18.5                          |
| PQT-12 (1:4)                | $1.6 \times 10^3$                      | 3.44           | 2.57                  | 35.7                          |
| PBTTT-C <sub>14</sub> (1:4) | $2.6 \times 10^3$                      | 3.20           | 2.76                  | 14.2                          |
| PTzBT-14HD (1:2)            | $1.5 \times 10^4$                      | 4.06           | 2.18                  | 10.9                          |
| PTzBT-14OD (1:2)            | $2.7 \times 10^4$                      | 3.58           | 2.47                  | 16.4                          |
| PTzBT-BOHD (1:2)            | $2.7 \times 10^3$                      | 4.78           | 1.85                  | 8.6                           |
| PCPDTBT (1:3)               | $1.3 \times 10^2$                      | 6.46           | 1.37                  | 2.9                           |
| PCPDTBT (1:3) DIO           | - <sup>d</sup>                         | - <sup>d</sup> | - <sup>d</sup>        | - <sup>d</sup>                |
| PSBTBT (1:2)                | $4.9 \times 10^2$                      | 5.24           | 1.69                  | 7.9                           |
| PBDTTT-CF (1:1.5)           | $8.5 \times 10^2$                      | 5.38           | 1.64                  | 3.7                           |
| PBDTTT-CF (1:1.5) DIO       | $6.3 \times 10^2$                      | 5.08           | 1.74                  | 3.2                           |
| PCDTBT (1:4)                | $1.2 \times 10^2$                      | 5.26           | 1.68                  | 4.5                           |

<sup>a</sup> Polymer (p/n blend ratio with PCBM) with/without DIO. <sup>b</sup> Inter-lamellar distance. <sup>c</sup> Correlation length in the inter-lamellar direction calculated using Scherrer equation. <sup>d</sup> Not obtained.

**Table S3. Electrochemical properties of the polymers.**

| Polymer               | HOMO /eV | LUMO /eV | bandgap /eV | Normalized $\eta_{\text{abs}}$ | Ref <sup>a</sup> |
|-----------------------|----------|----------|-------------|--------------------------------|------------------|
| PCPDTBT               | -5.30    | -3.55    | 1.75        | 1.00                           | [S9]             |
| PBDTTT-CF             | -5.22    | -3.45    | 1.77        | 0.97                           | [S10]            |
| PCDTBT                | -5.50    | -3.60    | 1.90        | 0.80                           | [S2]             |
| PSBTBT                | -5.05    | -3.27    | 1.78        | 0.96                           | [S4]             |
| P3HT                  | -5.10    | -3.10    | 2.00        | 0.68                           | [S11]            |
| PQT-12                | -5.10    | -3.10    | 2.00        | 0.68                           | [S7]             |
| PBTTT-C <sub>14</sub> | -5.10    | -3.10    | 2.00        | 0.68                           | [S6]             |
| PTzBT-BOHD            | -5.23    | -3.43    | 1.80        | 0.93                           | [S8]             |
| PTzBT-14HD            | -5.21    | -3.41    | 1.80        | 0.93                           | [S8]             |
| PTzBT-14OD            | -5.21    | -3.41    | 1.80        | 0.93                           | [S8]             |

<sup>a</sup> Reference number of the electrochemical properties.

**Table S4. Charge collection efficiency calculated by Hecht equation.**

| Polymer <sup>a</sup> | $\tau_{1/2}$ ( $\mu\text{s}$ ) <sup>b</sup> | SCLC hole mobility ( $\text{cm}^2\text{V}^{-1}\text{s}^{-1}$ ) | $V_{oc}$ (V) | Thickness (nm) | $\eta_{cc}$ <sup>c</sup> | Ref <sup>d</sup> |
|----------------------|---------------------------------------------|----------------------------------------------------------------|--------------|----------------|--------------------------|------------------|
| PCPDTBT (1:3)        | 0.18                                        | $4.0 \times 10^{-4}$                                           | 0.66         | 100            | 0.62                     | [S12]            |
| PBDTTT-CF (1:1)      | 0.22                                        | $7.0 \times 10^{-4}$                                           | 0.76         | 100            | 0.81                     | [S10]            |
| PCDTBT (1:4)         | 0.20                                        | $1.5 \times 10^{-4}$ (FET)                                     | 0.90         | 100            | 0.46                     | [S13]            |
| PSBTBT               | 0.35                                        | $1.0 \times 10^{-3}$ (FET)                                     | 0.68         | 100            | 0.90                     | [S14]            |
| P3HT (1:1)           | 0.50                                        | $3.1 \times 10^{-4}$                                           | 0.61         | 220            | 0.36                     | [S15]            |
| PQT-12 (1:4)         | 0.50                                        | $2.7 \times 10^{-4}$                                           | 0.61         | 220            | 0.32                     | [S16]            |
| PBTBT (1:4)          | 0.089                                       | $3.8 \times 10^{-4}$                                           | 0.61         | 100            | 0.38                     | [S6]             |
| PTzBT-BOHD (1:2)     | 0.22                                        | $4.8 \times 10^{-4}$                                           | 0.53         | 100            | 0.66                     | [S8]             |
| PTzBT-14HD (1:2)     | 0.85                                        | $1.9 \times 10^{-4}$                                           | 0.89         | 200            | 0.54                     | [S8]             |
| PTzBT-14OD (1:2)     | 0.95                                        | $3.6 \times 10^{-4}$                                           | 0.82         | 200            | 0.72                     | [S8]             |

<sup>a</sup> Polymer (p/n blend ratio with PCBM). <sup>b</sup> Half-lifetime of TRMC transient excited at 355 nm

( $I_0 = 4.6 \times 10^{15}$  photons  $\text{cm}^{-2}$ ). <sup>c</sup>  $\eta_{cc}$  was calculated by Hecht expression<sup>S17,S18</sup> given by

$$\eta_{cc} = \frac{\mu\tau V_b}{d \cdot d_c} \left\{ 1 - \exp\left(-\frac{d \cdot d_c}{\mu\tau V_b}\right) \right\}$$

, where  $\mu$  is the mobility,  $\tau$  is the lifetime,  $V_b$  is the internal bias voltage at the short circuit ( $= V_{oc}$ ),  $d$  is the thickness of the active layer, and  $d_c$  is the average collection length ( $= d/2$ ). <sup>d</sup> Reference number of the SCLC or FET mobilities.



## Supporting Figures.

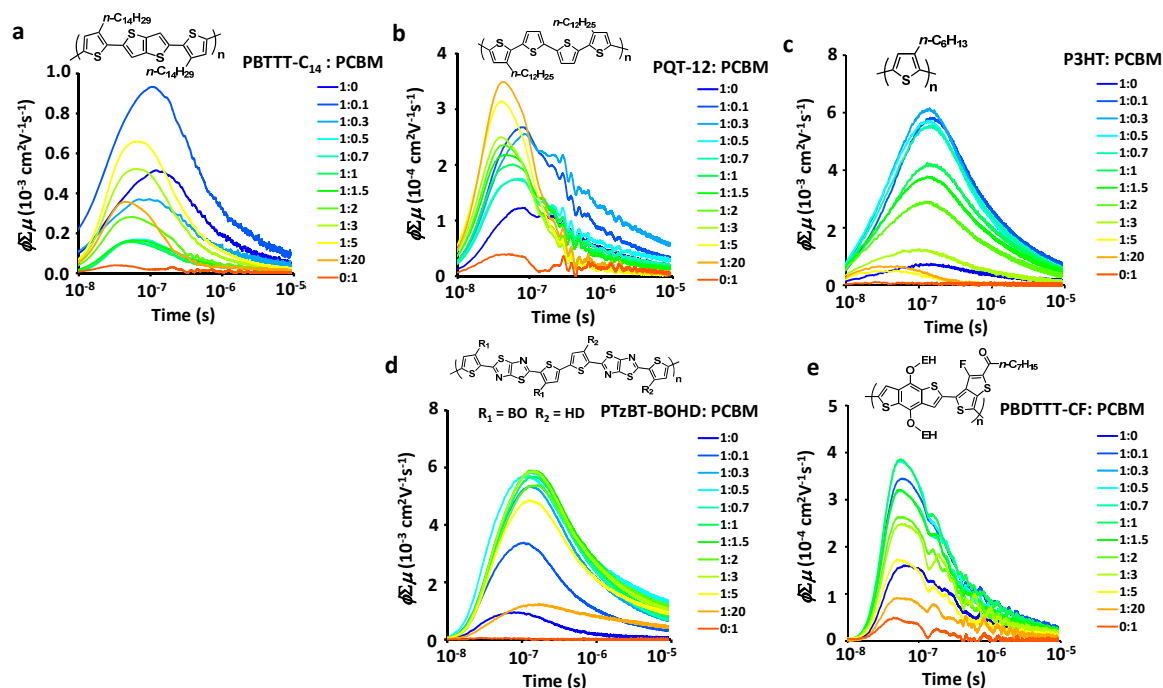

**Figure S1.** TRMC transients of a) PBTTT-C<sub>14</sub>:PCBM, b) PQT-12:PCBM, c) P3HT:PCBM, d) PTzBT-BOHD:PCBM, and e) PBDTTT-CF:PCBM blend films under 355 nm excitation. Each color line corresponds to the blend ratio shown in the inset.

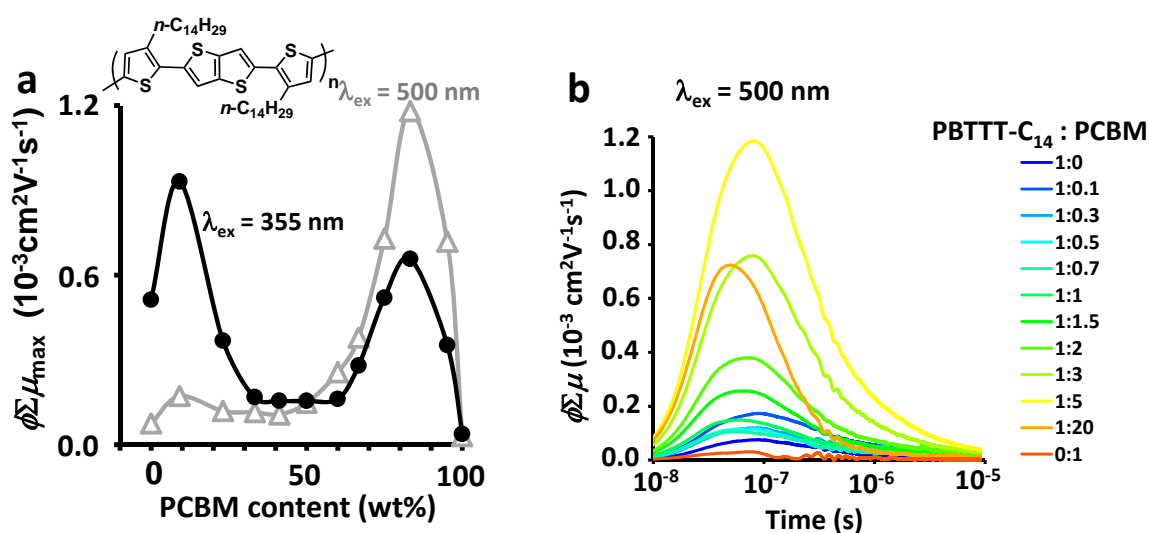

**Figure S2.** a)  $\phi \sum \mu_{\max}$  dependence of PBTTT-C<sub>14</sub>:PCBM on PCBM under 355 (black circles) and 500 (gray triangles) nm. b) TRMC transients of a PBTTT-C<sub>14</sub>:PCBM at 500 nm excitation. Each color line corresponds to the blend ratio shown in the inset.

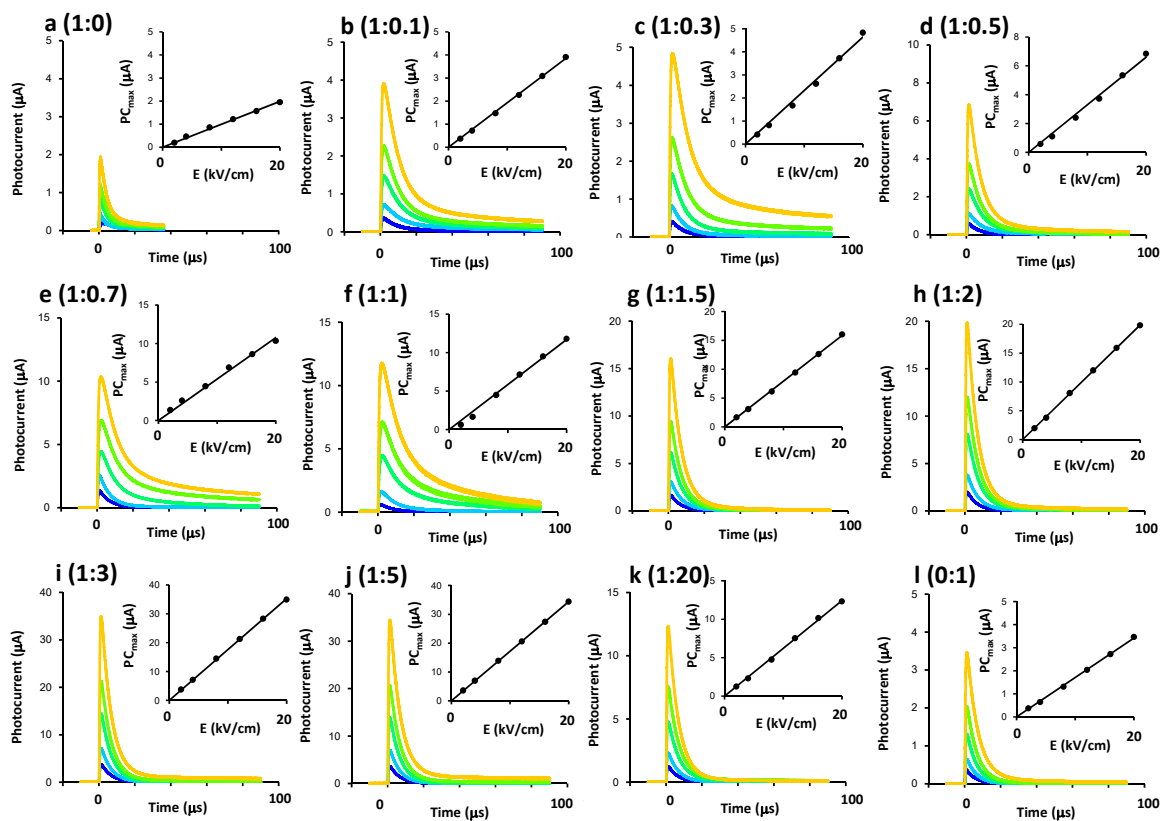

**Figure S3.** PC transients of BTTT-C<sub>14</sub>:PCBM blend films excited at 355 nm. The applied direct-current voltages are increased from blue (2 kV cm<sup>-1</sup>), green to orange (20 kV cm<sup>-1</sup>). The blend ratio of polymer and PCBM is shown in the blankets.

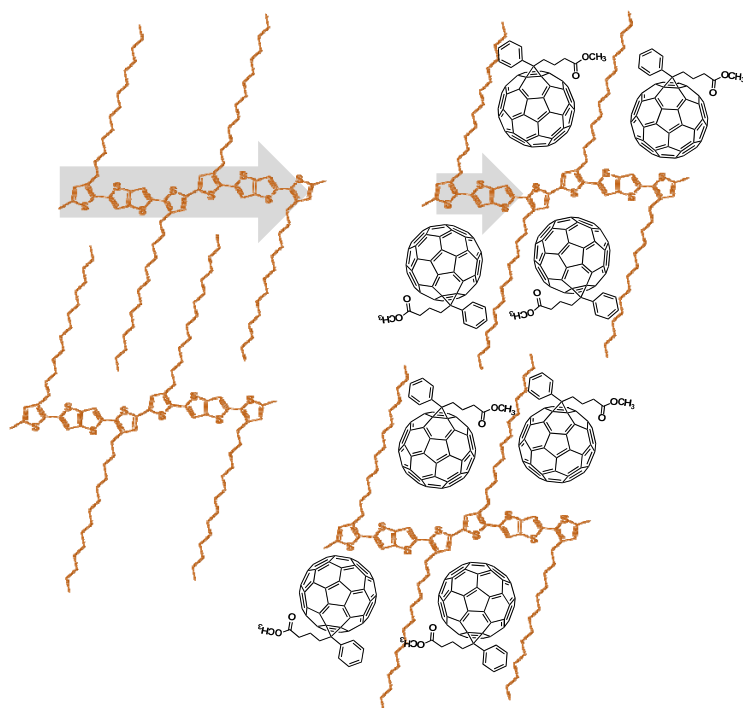

**Figure S4.** Schematic drawing of PCBM intercalation into PBTTT-C<sub>14</sub>.<sup>[S19]</sup> The gray arrows represents the degree of intramolecular hole transport.

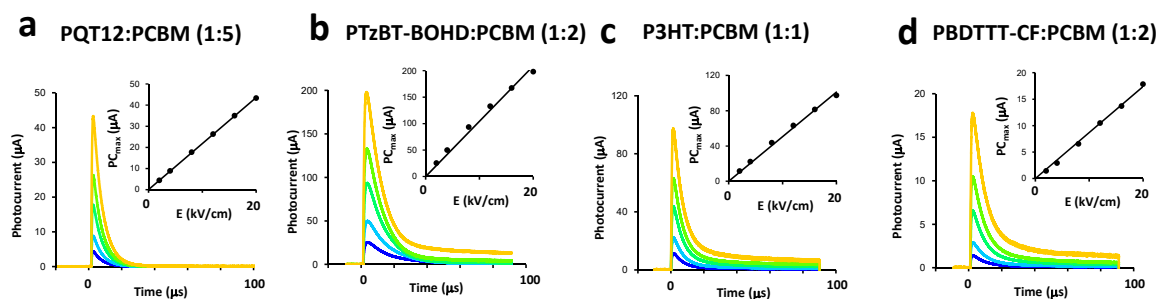

**Figure S5.** PC transients of a) PQT-12:PCBM (1:5 in wt%), b) PTzBT-BOHD:PCBM (1:2 in wt%), c) P3HT:PCBM (1:1 in wt%), and d) PBDTTT-CF:PCBM (1:2 in wt%) blend films excited at 355 nm. The applied direct-current voltages are increased from blue ( $2 \text{ kV cm}^{-1}$ ), green to orange ( $20 \text{ kV cm}^{-1}$ ).

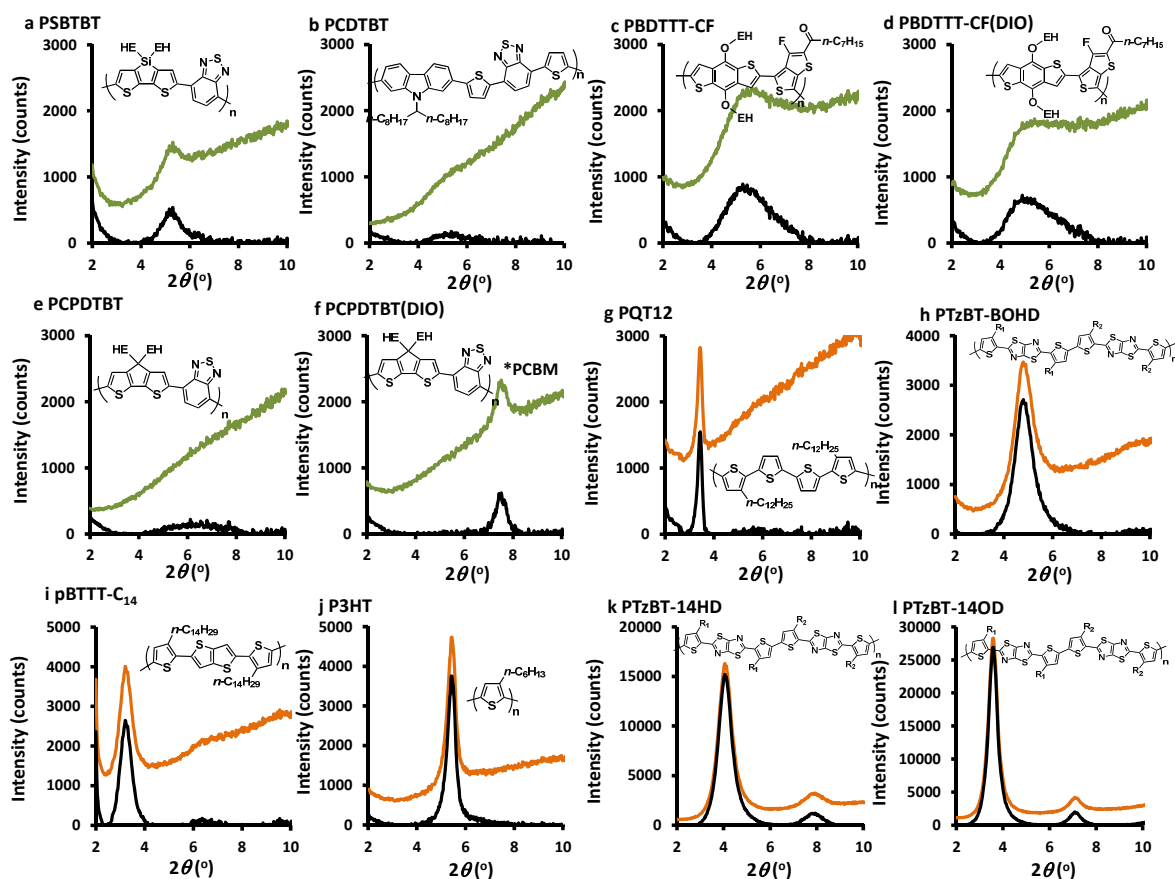

**Figure S6.** XRD spectra of polymer:PCBM films at device-optimal blend ratio in out-of-plane direction (Cu K $\alpha$ : 1.5418 Å). The colored and black lines are the raw data and baseline-subtracted data, respectively. The peak intensities in Table S2 are based on the latter. The peak of PCPDTBT(DIO) in the panel f is due to PCBM.<sup>S20</sup>

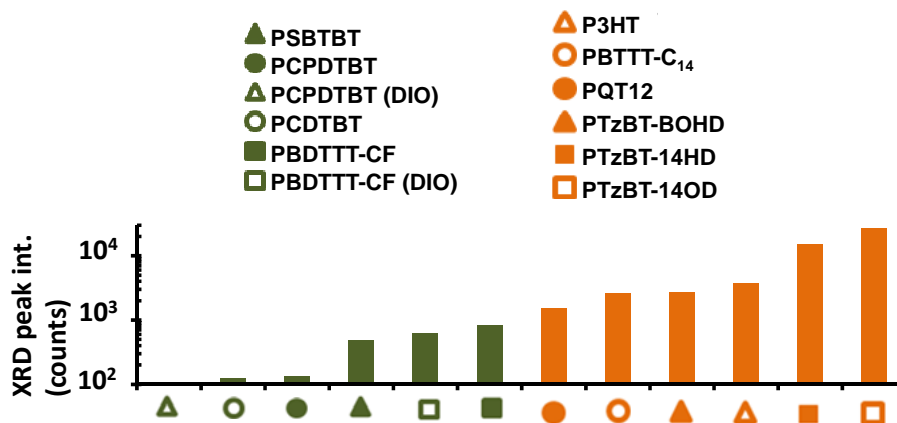

**Figure S7.** XRD peak intensities at the inter-lamellar diffraction peaks of device-optimal polymer:PCBM blends in the out-of-plane direction.

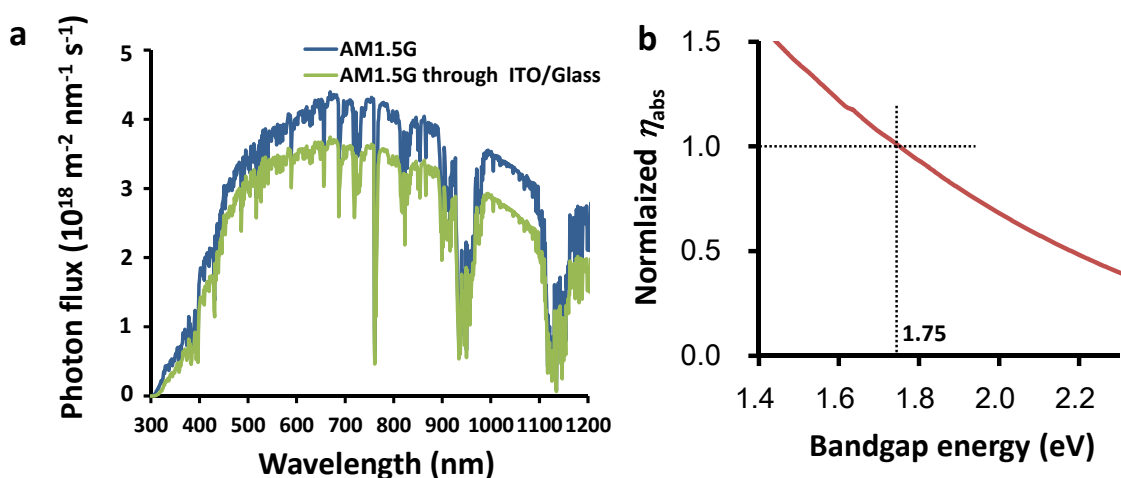

**Figure S8.** a) AM1.5G solar spectrum (blue line) and that through a glass/ITO substrate (green line). b) Photoabsorption efficiency normalized at the bandgap energy ( $E_g$ ) of 1.75 eV (PCPDTBT). The curve was constructed by integrating the green line in a) and assuming 100% absorption of photon for  $> E_g$ .

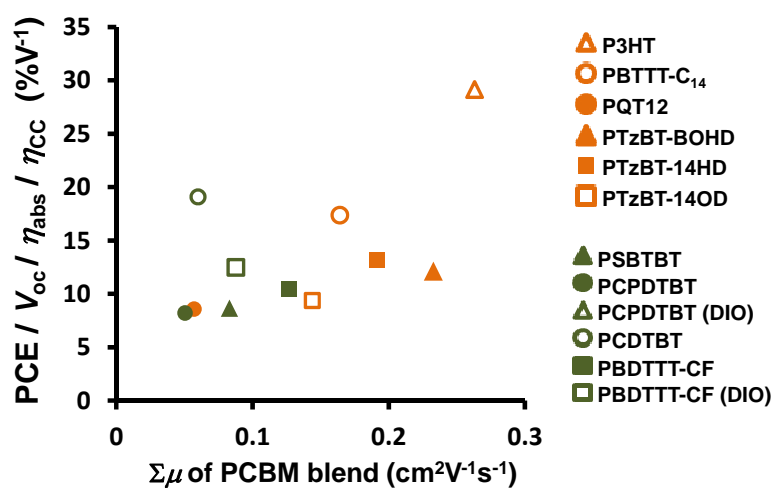

**Figure S9.**  $\text{PCE} / V_{\text{oc}} / \eta_{\text{abs}} / \eta_{\text{CC}}$  vs. TRMC mobilities of the polymer:PCBM blends.  $\eta_{\text{CC}}$  was calculated by Hecht equation with long range mobilities of SCLC or FET. See Table S4.

## REFERENCES

- [S1] J. K. Lee, W. L. Ma, C. J. Brabec, J. Yuen, J. S. Moon, J. Y. Kim, K. Lee, G. C. Bazan, A. J. Heeger, *J. Am. Chem. Soc.* **2008**, *130*, 3619-3623.
- [S2] S. H. Park, A. Roy, S. Beaupré, S. Cho, N. Coates, J. S. Moon, D. Moses, M. Leclerc, K. Lee, A. J. Heeger, *Nature Photo.* **2009**, *3*, 297-303.
- [S3] Y. Liang, Z. Xu, J. Xia, S.-T. Tsai, Y. Wu, G. Li, C. Ray, L. Yu, *Adv. Mater.* **2010**, *22*, E135-E138.
- [S4] J. Hou, H. -Y. Chen, S. Zhang, G. Li, Y. Yang, *J. Am. Chem. Soc.* **2008**, *130*, 16144-16145.
- [S5] G. Kim, S. Cook, S. M. Tuladhar, S. A. Choulis, J. Nelson, J. R. Durrant, D. D. C. Bradley, M. Giles, I. McCulloch, C.-S. Ha, M. Ree, *Nature Mater.* **2006**, *5*, 197-203.
- [S6] N. C. Cates, R. Gysel, Z. Beiley, C. E. Miller, M. F. Toney, M. Heeney, I. McCulloch, M. D. McGehee, *App. Phys. Lett.* **2008**, *92*, 113309/1-3.
- [S7] A. J. Moulé, S. Allard, N. M. Kronenberg, A. Tsami, U. Scherf, K. Meerholz. *J. Phys. Chem. C* **2008**, *112*, 12583- 12589.
- [S8] I. Osaka, M. Saito, T. Koganezawa, K. Takimiya, *Adv. Mater.* **2014**, *26*, 331-338.
- [S9] S. Albrecht, S. Janietz, W. Schindler, J. Frisch, J. Kurpiers, J. Kniepert, S. Inal, P. Pingel, K. Fostiropoulos, N. Koch, D. Neher, *J. Am. Chem. Soc.* **2012**, *134*, 14932-14944.
- [S10] H. -Y. Chen, J. Hou, S. Zhang, Y. Liang, G. Yang, Y. Yang, L. Yu, Y. Wu, G. Li, *Nature Photo.* **2009**, *3*, 649-653.
- [S11] T. Ameri, J. Min, N. Li, F. Machui, D. Baran, M. Forster, K. J. Schottler, D. Dolfen, U. Scherf, C. J. Brabec, *Adv. Energy Mater.* **2012**, *2*, 1198-1202.
- [S12] S. Yamamoto, H. Ohkita, H. Benten, S. Ito, *J. Phys. Chem. C* **2012**, *116*, 14804-14810.
- [S13] T.-T. Chu, S. Alem, S. -W. Tsang, S.- C. Tse, S. Wakim, J. Lu, G. Dennler, D. Waller, R. Gaudiana, Y. Tao, *Appl. Phys. Lett.* **2011**, *98*, 253301/1-3.
- [S14] M. C. Scharber, M. Koppe, J. Gao, F. Cordella, M. A. Loi, P. Denk, M. Morana, H.-J. Egelhaaf, K. Forberich, G. Dennler, R. Gaudiana, D. Waller, Z. Zhu, X. Shi. C. J. Brabec, *Adv. Mater.* **2010**, *22*, 367-370.
- [S15] Y.-J. Cheng, C. -H. Hsieh, P.- J. Li, C. -S. Hsu, *Adv. Funct. Mater.* **2011**, *21*, 1723-1732.
- [S16] B. C. Thompson, B. J. Kim, D. F. Kavulak, K. Sivula, C. Mauldin, J. M. J. Fréchet, *Macromolecules* **2007**, *40*, 7425-7428.
- [S17] R. A. Street, M. Schoendorf, A. Roy, J. H. Lee, *Phys. Rev. B* **2010**, *81*, 205307/1-12.
- [S18] J. R. Tumbleston, Y. Liu, E. T. Samulski, R. Lopez, *Adv. Energy Mater.* **2012**, *2*, 477-486.
- [S19] N. C. Miller, E. Cho, M. J. N. Junk, R. Gysel, C. Risko, D. Kim, S. Sweetnam, C. E. Miller, L. J. Richter, R. J. Kline, M. Heeney, I. McCulloch, A. Amassian, D. Acevedo-Feliz, C. Knox, M. R. Hansen, D. Dudenko, B. F. Chmelka, M. F. Toney, J. -L. Brédas, M. D. McGehee, *Adv. Mater.* **2012**, *24*, 6071-6079.
- [S20] A. A. Y. Guilbert, J. M. Frost, T. Agostinelli, E. Pires, S. Lilliu, J. E. Macdonald, J. Nelson, *Chem. Mater.* **2014**, *26*, 1226-1233.
